# Supplementary material for: Supramolecular isomerism within three-dimensional 3-connected nets: unusual synthesis and characterization of trimorphic copper(i) 3,5-dimethyl-1,2,4-triazolate
Source: Royal Society of Chemistry journal article supplement (doi:10.1039/b509615d), 2005-01-01
Supplement: b509615d.pdf [file b509615d.pdf]

**Supramolecular isomerism within three-dimensional 3-connected nets: Unusual synthesis and characterization of trimorphic copper(I) 3,5-dimethyl-1,2,4-triazolate**

**Jie-Peng Zhang, Xiao-Chun Huang, Yan-Yong Lin and Xiao-Ming Chen\***

School of Chemistry and Chemical Engineering, Sun Yat-Sen University, Guangzhou 510275, China. Fax: +86 20 8411-2245; Tel:+86 20 8411-3986; E-mail: cesxm@zsu.edu.cn

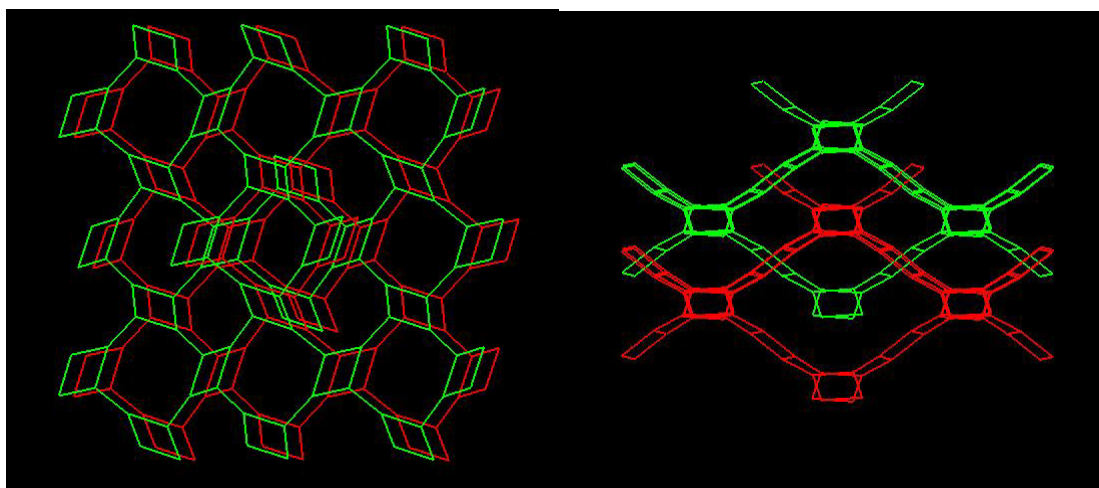

Figure 1a. Perspective views of two fold interpenetrated 4.8.10 nets in **1**. (Left: along the *c*-axis, right: along the *a*-axis)

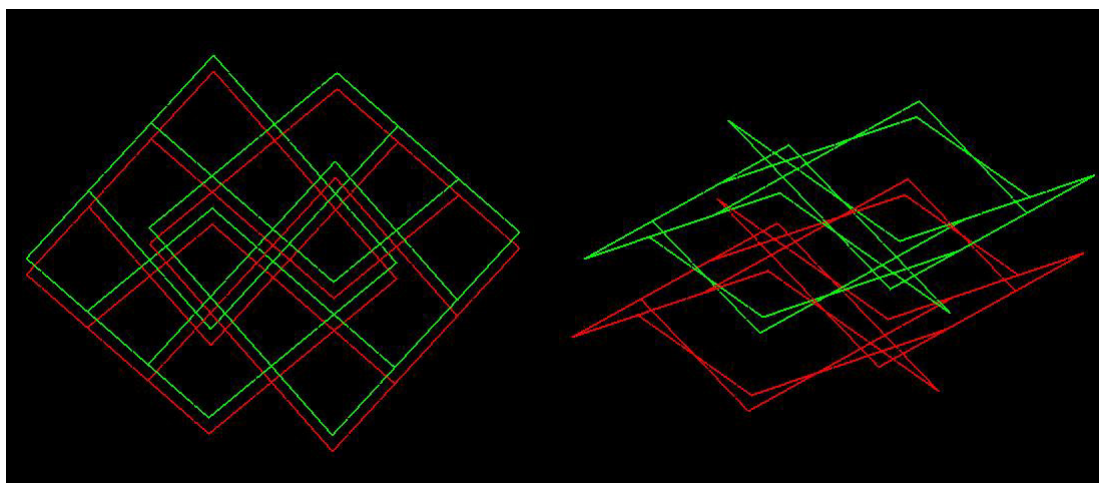

Figure 1b. Perspective views of two fold interpenetrated  $4^2 8^4$  nets in **1**. (Left: along the *c*-axis, right: along the *a*-axis)

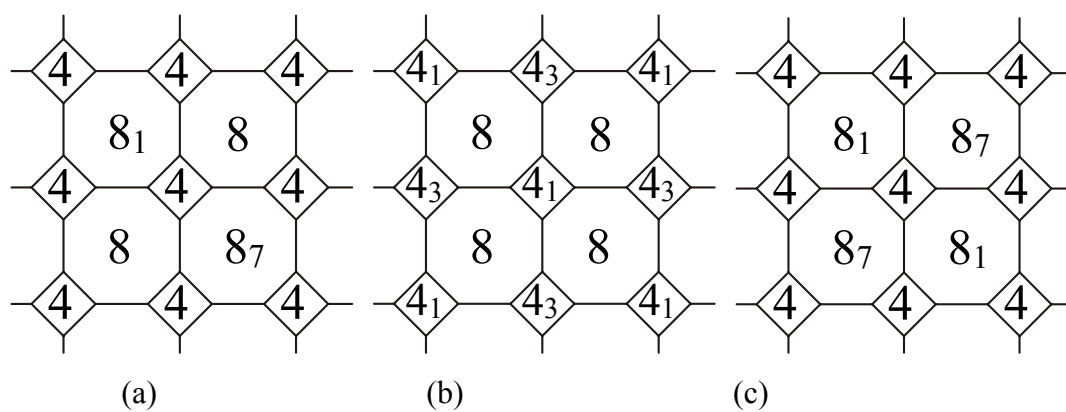

Figure 2. Projections of 4.8.10,  $8^2 10$ -a, and  $4.14^2$  nets.

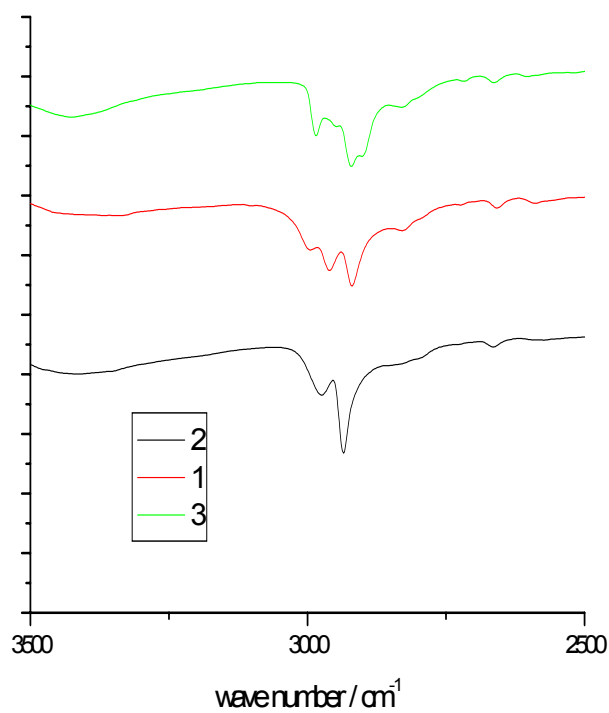

Figure 3. IR spectra of **1-3**.

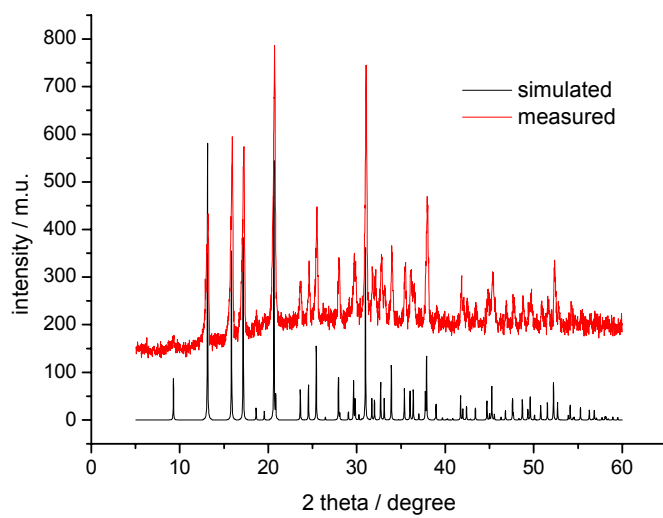

Figure 4a. XRD pattern of **1**.

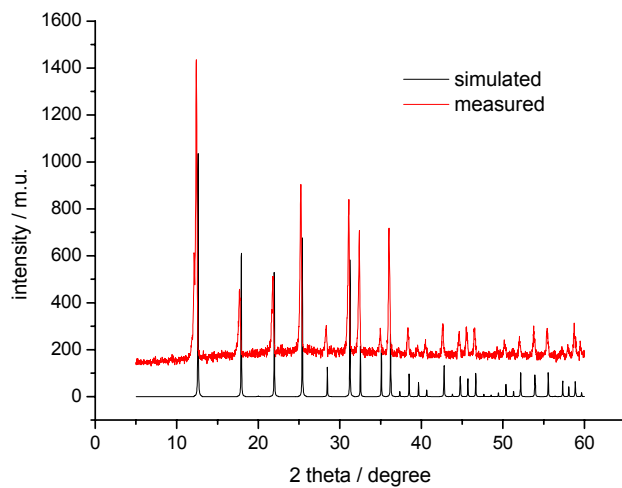

Figure 4b. XRD pattern of **2**.

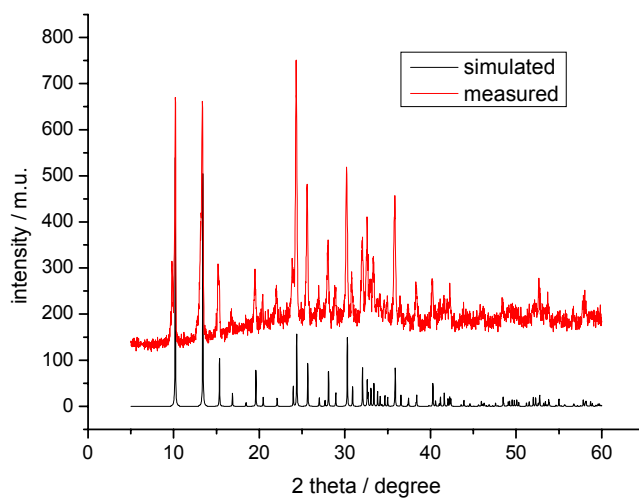

Figure 4c. XRD pattern of **3**.

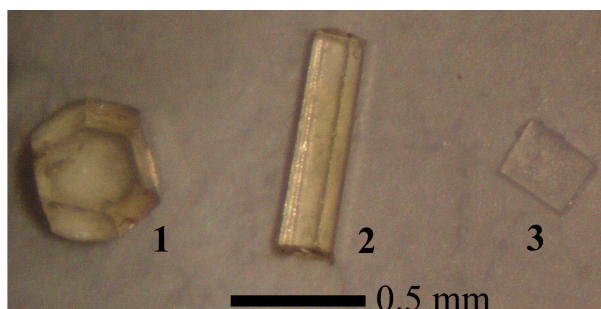

Figure 5. Photographs of the three isomers
